# Supplementary material for: Whole exome sequencing of familial hypercholesterolaemia patients negative for LDLR/APOB/PCSK9 mutations
Source: PubMed Central journal article supplement (PMC4112429; doi:10.1136/jmedgenet-2014-102405), 2014-08
Supplement: jmedgenet-2014-102405-s1.pdf [file jmedgenet-2014-102405-s1.pdf]

## SUPPLEMENTARY METHODS

### Control samples cohorts:

UK10K\_NEURO\_ABERDEEN (n=387)  
UK10K\_NEURO\_ASD\_GALLAGHER (n=75)  
UK10K\_NEURO\_EDINBURGH (n=233)  
UK10K\_NEURO\_GURLING (n=48)  
UK10K\_NEURO\_IOP\_COLLIER (n=172)  
UK10K\_NEURO\_MUIR (n=166)  
UK10K\_OBESITY\_GS (n=421)  
UK10K\_OBESITY\_TWINSUK (n=67)  
UK10K\_RARE\_CILIOPATHIES (n=121)  
UK10K\_RARE\_NEUROMUSCULAR (n=114)  
UK10K\_RARE\_THYROID (n=122)

For more details see <http://www.uk10k.org/studies/>.

### Whole exome sequencing

Genomic DNA (1–3 µg), extracted from blood (*I*), was sheared to 100–400 bp using a Covaris E210 or LE220 (Covaris, Woburn, Massachusetts, USA). Sheared DNA was subjected to Illumina paired-end DNA library preparation and enriched for target sequences (Agilent Technologies, Santa Clara, CA, USA; Human All Exon 50 Mb - ELID S02972011) according to the manufacturer's recommendations (Agilent Technologies, Santa Clara, CA, USA; SureSelectXT Automated Target Enrichment for Illumina Paired-End Multiplexed Sequencing). Enriched libraries were sequenced (eight samples over two lines) using the HiSeq 2000 platform (Illumina) as paired-end 75 base reads according to the manufacturer's protocol.

### Variant calling

Calls were made using samtools/bcftools version 0.1.19-3-g4b70907 from all UK10K per-sample exome BAMs split by chromosome. A BCF file was created with samtools mpileup, calculating genotype likelihoods for every site in the bait (+/-100bp) regions file then variants (SNPs and Indels) were called by bcftools.

## SUPPLEMENTARY RESULTS

### Gene coverage

The overall mean coverage of *LDLR*, *APOB*, *PCSK9* and *LDLRAP1* ranged from 42x (*LDLR*), to 18x (*PCSK9*), with the first and the last exons of a gene having the lowest coverage. The read depth was highly dependent on the GC content of an exon (regression  $p = 4.9 \times 10^{-14}$ ) (Figure S2). Exons of the *APOB* had the highest average read depth among Tier 1 genes (58x).

### **LDL-C SNPs score**

The distribution of LDL-C SNPs scores in FH mutation negative patients and in the healthy WHII population was as shown in Figure S3.

The *APOE*  $\epsilon 2\epsilon 2$  genotype was not observed among the genotyped patients. There were two individuals with the  $\epsilon 2\epsilon 3$  genotype, both having an *LDLR* mutation. Five patients had the  $\epsilon 4\epsilon 4$  isoform.

Figure S1.

Copy Number Variants (CNVs) in *LDLR* gene. A: Heterozygous duplication of exons 3 to 8. B: Heterozygous deletion of exons 11 and 12. C: Heterozygous duplication of exons 13 to 15. All identified by ExomeDepth in the exome sequencing data. The crosses show the ratio of observed/expected number of reads for the test sample. The grey shaded region shows the estimated 99% confidence interval for this observed ratio in the absence of CNV call. The presence of contiguous exons with read count ratio located outside of the confidence interval is indicative of a heterozygous deletion or duplication in a sample. Exons 1 and 18 were excluded from the analysis (not shown on the graph) as they did not reach the threshold of 100 for the total number of reads. All CNVs were confirmed by MLPA experiment. The deletion of exons 11-12 and duplication of exons 13-15 both lead to a frame shift. The duplication of exons 3-8 leads to elongated peptide and it has been previously found in FH patients (2).

A

B

C

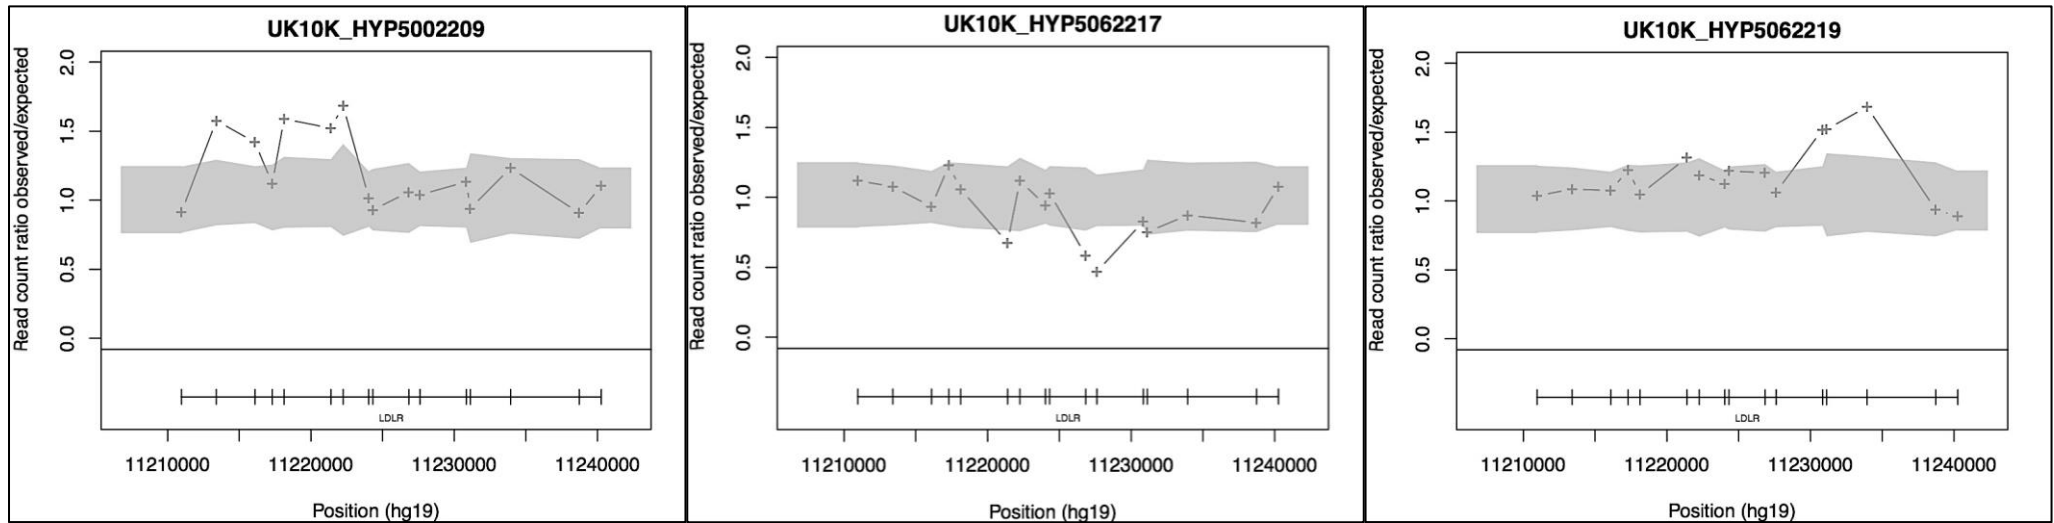

Figure S2.

The negative correlation of the median read depth and the GC content for each targeted exon of the four FH genes (*LDLR*, *APOB*, *PCSK9* and *LDLRAP1*).

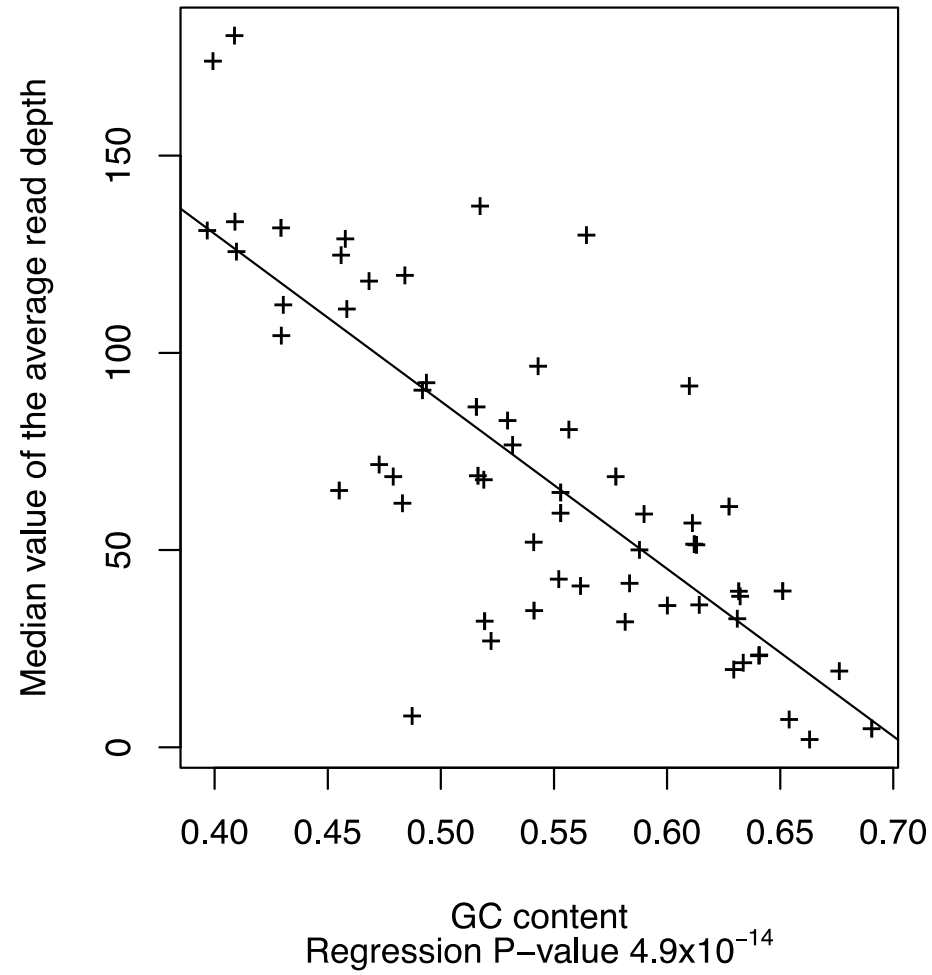

Figure S3.

Distribution of the LDL-C SNPs score in mutation negative DFH patients (in purple) and in the healthy WHII cohort (in grey). Red line indicates the LDL-C score top decile cutoff for WHII (=1.16).

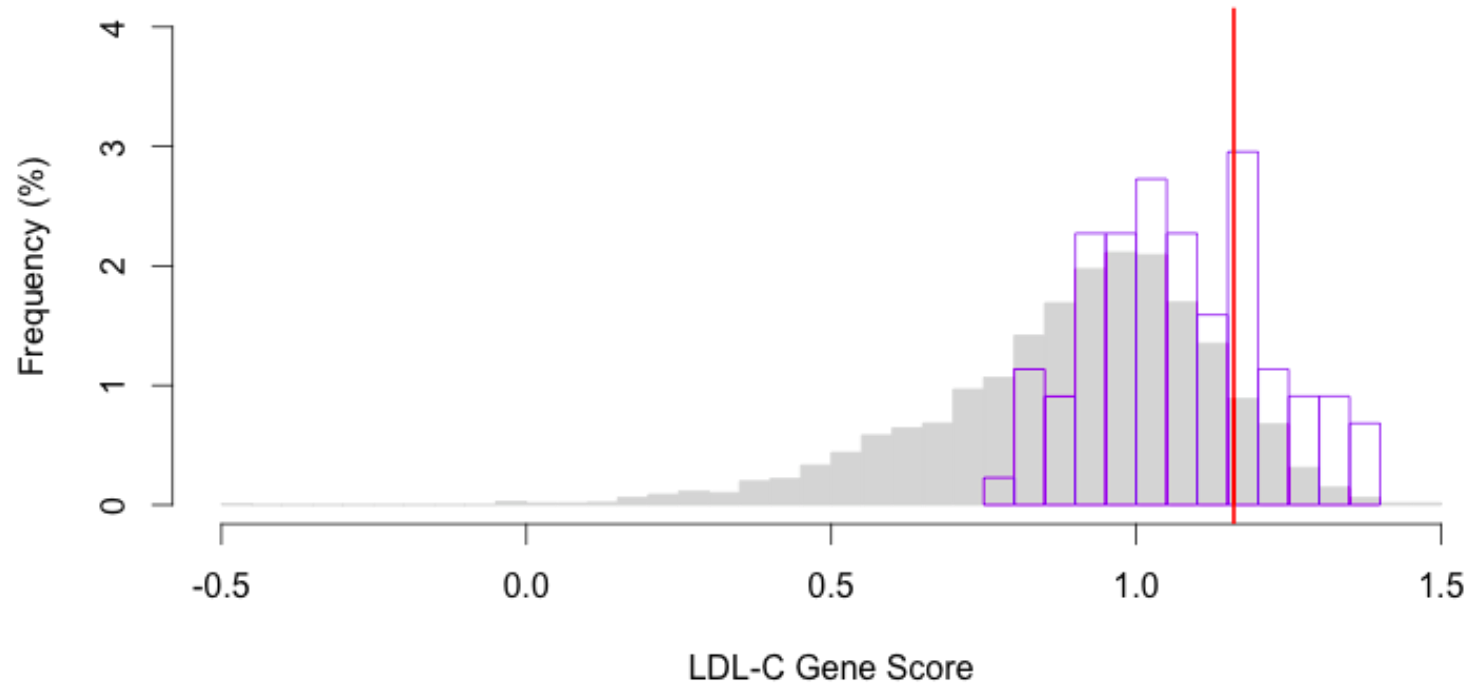

Figure S4.

Sanger sequencing confirmation of novel *CH25H* variants. Primers used for the amplification of the region are highlighted in blue and in purple

*CH25H* sequencing (order #410822401)

```

90966631 TYGTGGCACCTGCTGCACCACAAGGTGCCCTGGYGTACCGCACCTTYCACAAAGGTGC 90966572
90966571 ACCACCRGAACCTCGCTCGTTCGCRCTGGCAACGCAGTATATGAGCGCTCGGGAAGTGT 90966512
90966511 TTTC TTGGGTTCTTCGACATGATGAAC TCACACTGCTYGGGTGCCACCCGCTCACCA 90966452
90966451 CCCTGACCTTCCACGTGGTCAACATCTGKCTTCCGTGGAGGWCCACTCCGGCTACAAYT 90966392
90966391 TCCCTTGGTCCACTCAGACTGGTGCCTTCGGGTGGTACGGGGGTGTGGTRCACC CG 90966332
90966331 ACCTGCATCACTCTCACTTTAACTGCAACTTCGCTCCRTACTTTACACACTGGGACAAAA 90966272
90966271 YACTGGGAACRCTGCGRACTGCATCTGTCCCAGCGCRRTGATGTGGCTGCGGTGGGTGCC 90966212
90966211 CCTAAGAMTCGGGACTCCTRTGCCCTTCACACTTGAATGAAGAGAAACACCTGAGCTATA 90966152
90966151 TATTTTTTAAAGCAACTAATTATTCCTTTATGTTATCTATGAAACCATAGATAAAA 90966092
90966091 TCTGATGCATTTTGTAACTGACAAAGTAATTTACATACTGTTTGTGTATCAATACAAT 90966032
    
```

\*Primers:  
CH25H\_01F / CH25H\_02R

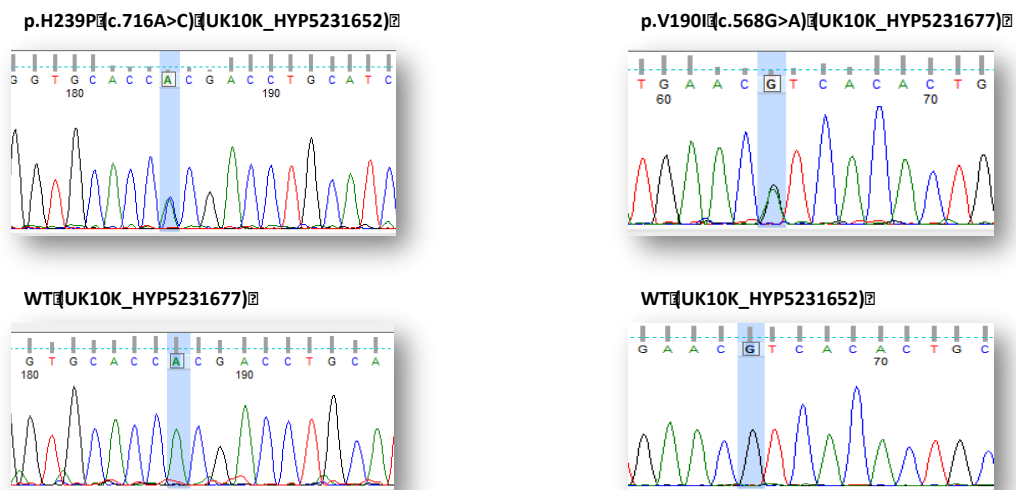

*CH25H* sequencing (order #4108796)

```

90966991 TGCAGCCCTCTGGGACCACCTGAGGAGCTGGGAGGCCCTCCTACAGTCGCCCTTCTTCC 90966932
90966931 CGGTCACTTCTCCATCACCACATACRTRGGCTTTTGCCTGCCCTTCGTGGTCTGGATA 90966872
90966871 TCCTGTGCTCTGGGTGCCCGCCCTGCGCGCCTACAAGATCCAYCCTGACTTCTGCCAT 90966812
90966811 CCGCGAGCAGCTGTACCTTGCCTGVGRACAGACCCTTACCAGCAKTGATGTTTGTGT 90966752
90966751 TCCCGTRACGCTGMTGCAATGGGCCYGCAGCCCGCCCTCCTGCCACGAAAGTCCCG 90966692
90966691 AGCTGCTCCTGCTGCTGCACCACATCCTGTCTGCCTGCIYACTCTTCGACATGGAGTCT 90966632
90966631 TYGTGGCACCTGCTGCACCACAAGGTGCCCTGGYGTACCGCACCTTYCACAAAGGTGC 90966572
90966571 ACCACCRGAACCTCGCTCGTTCGCRCTGGCAACGCAGTATATGAGCGCTCGGGAAGTGT 90966512
90966511 TTTC TTGGGTTCTTCGACATGATGAAC TCACACTGCTYGGGTGCCACCCGCTCACCA 90966452
90966451 CCCTGACCTTCCACGTGGTCAACATCTGKCTTCCGTGGAGGWCCACTCCGGCTACAAYT 90966392
90966391 TCCCTTGGTCCACTCAGACTGGTGCCTTCGGGTGGTACGGGGGTGTGGTRCACC CG 90966332
90966331 ACCTGCATCACTCTCACTTTAACTGCAACTTCGCTCCRTACTTTACACACTGGGACAAAA 90966272
90966271 YACTGGGAACRCTGCGRACTGCATCTGTCCCAGCGCRRTGATGTGGCTGCGGTGGGTGCC 90966212
    
```

\*Primers:  
CH25H\_03F / CH25H\_04R

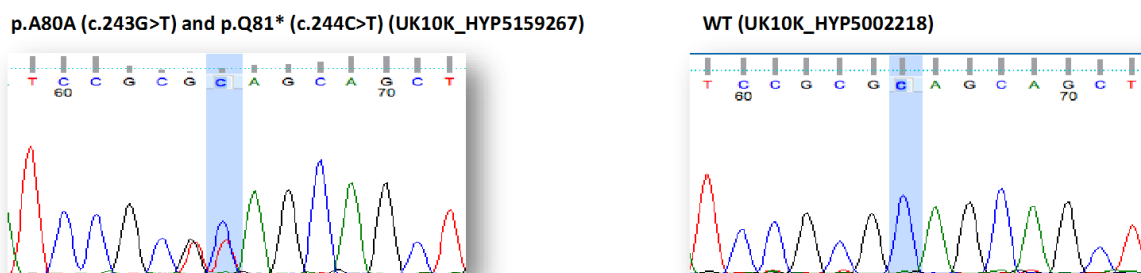



**Table S1.**

Summary of methods used for the initial FH mutation screening.

| BATCH | UK10K ID         | Original study cohort | Ref | <i>LDLR</i>                                                                            | MLPA of <i>LDLR</i> | <i>APOB</i>                                                                                      | <i>PCSK9</i>                                                           |
|-------|------------------|-----------------------|-----|----------------------------------------------------------------------------------------|---------------------|--------------------------------------------------------------------------------------------------|------------------------------------------------------------------------|
| 4     | UK10K_HYP5231659 | Australian FH         | (3) | all exons and promoter by Big Dye Terminator chemistry (Applied Biosystems) sequencing | yes                 | fragment of exon 26, and exon 29 by Big Dye Terminator chemistry (Applied Biosystems) sequencing | exon 7 by Big Dye Terminator chemistry (Applied Biosystems) sequencing |
| 4     | UK10K_HYP5231660 | Australian FH         |     |                                                                                        |                     |                                                                                                  |                                                                        |
| 4     | UK10K_HYP5231661 | Australian FH         |     |                                                                                        |                     |                                                                                                  |                                                                        |
| 4     | UK10K_HYP5231662 | Australian FH         |     |                                                                                        |                     |                                                                                                  |                                                                        |
| 4     | UK10K_HYP5231663 | Australian FH         |     |                                                                                        |                     |                                                                                                  |                                                                        |
| 4     | UK10K_HYP5231664 | Australian FH         |     |                                                                                        |                     |                                                                                                  |                                                                        |
| 4     | UK10K_HYP5231665 | Australian FH         |     |                                                                                        |                     |                                                                                                  |                                                                        |
| 4     | UK10K_HYP5231666 | Australian FH         |     |                                                                                        |                     |                                                                                                  |                                                                        |
| 4     | UK10K_HYP5231667 | Australian FH         |     |                                                                                        |                     |                                                                                                  |                                                                        |
| 4     | UK10K_HYP5231668 | Australian FH         |     |                                                                                        |                     |                                                                                                  |                                                                        |
| 4     | UK10K_HYP5231669 | Australian FH         |     |                                                                                        |                     |                                                                                                  |                                                                        |
| 4     | UK10K_HYP5231670 | Australian FH         |     |                                                                                        |                     |                                                                                                  |                                                                        |
| 4     | UK10K_HYP5231671 | Australian FH         |     |                                                                                        |                     |                                                                                                  |                                                                        |
| 4     | UK10K_HYP5231672 | Australian FH         |     |                                                                                        |                     |                                                                                                  |                                                                        |
| 4     | UK10K_HYP5231673 | Australian FH         |     |                                                                                        |                     |                                                                                                  |                                                                        |
| 4     | UK10K_HYP5231674 | Australian FH         |     |                                                                                        |                     |                                                                                                  |                                                                        |
| 4     | UK10K_HYP5231675 | Australian FH         |     |                                                                                        |                     |                                                                                                  |                                                                        |
| 5     | UK10K_HYP5269604 | Israeli FH            | -   | all exons and promoter by SSCP                                                         | no                  | APOB fragment of exon 26 by SSCP                                                                 | no                                                                     |
| 5     | UK10K_HYP5269605 | Israeli FH            |     |                                                                                        |                     |                                                                                                  |                                                                        |
| 5     | UK10K_HYP5269606 | Israeli FH            |     |                                                                                        |                     |                                                                                                  |                                                                        |
| 5     | UK10K_HYP5269607 | Israeli FH            |     |                                                                                        |                     |                                                                                                  |                                                                        |
| 5     | UK10K_HYP5269608 | Israeli FH            |     |                                                                                        |                     |                                                                                                  |                                                                        |
| 5     | UK10K_HYP5269609 | Israeli FH            |     |                                                                                        |                     |                                                                                                  |                                                                        |
| 7     | UK10K_HYP5358903 | Israeli FH            |     |                                                                                        |                     |                                                                                                  |                                                                        |
| 7     | UK10K_HYP5358904 | Israeli FH            |     |                                                                                        |                     |                                                                                                  |                                                                        |
| 7     | UK10K_HYP5358905 | Israeli FH            |     |                                                                                        |                     |                                                                                                  |                                                                        |
| 7     | UK10K_HYP5358906 | Israeli FH            |     |                                                                                        |                     |                                                                                                  |                                                                        |
| 4     | UK10K_HYP5231679 | Italy FH              | (4) | all exons and                                                                          | yes                 | c.9216 to                                                                                        | all exons by                                                           |



|   |                  |                     |     |                                                     |     |                                                   |                             |
|---|------------------|---------------------|-----|-----------------------------------------------------|-----|---------------------------------------------------|-----------------------------|
| 4 | UK10K_HYP5231676 | Italy FH            |     | promoter by Sanger sequencing                       |     | c.11788 +152 nt of intron 26 by Sanger sequencing | Sanger sequencing           |
| 4 | UK10K_HYP5231677 | Italy FH            |     |                                                     |     |                                                   |                             |
| 4 | UK10K_HYP5231678 | Italy FH            |     |                                                     |     |                                                   |                             |
| 5 | UK10K_HYP5269570 | Northern Ireland FH | (5) | all exons and promoter by TTGE/DDGE                 | yes | RFLP for p.R3527Q                                 | Exon 7 by Sanger sequencing |
| 5 | UK10K_HYP5269571 | Northern Ireland FH |     |                                                     |     |                                                   |                             |
| 5 | UK10K_HYP5269572 | Northern Ireland FH |     |                                                     |     |                                                   |                             |
| 5 | UK10K_HYP5269573 | Northern Ireland FH |     |                                                     |     |                                                   |                             |
| 5 | UK10K_HYP5269574 | Northern Ireland FH |     |                                                     |     |                                                   |                             |
| 5 | UK10K_HYP5269575 | Northern Ireland FH |     |                                                     |     |                                                   |                             |
| 5 | UK10K_HYP5269576 | Northern Ireland FH |     |                                                     |     |                                                   |                             |
| 5 | UK10K_HYP5269577 | Northern Ireland FH |     |                                                     |     |                                                   |                             |
| 5 | UK10K_HYP5269578 | Northern Ireland FH |     |                                                     |     |                                                   |                             |
| 5 | UK10K_HYP5269581 | Northern Ireland FH |     |                                                     |     |                                                   |                             |
| 3 | UK10K_HYP5159271 | Oxford FH           |     |                                                     |     |                                                   |                             |
| 3 | UK10K_HYP5159272 | Oxford FH           |     |                                                     |     |                                                   |                             |
| 3 | UK10K_HYP5159273 | Oxford FH           |     |                                                     |     |                                                   |                             |
| 3 | UK10K_HYP5159274 | Oxford FH           |     |                                                     |     |                                                   |                             |
| 3 | UK10K_HYP5159275 | Oxford FH           |     |                                                     |     |                                                   |                             |
| 4 | UK10K_HYP5231650 | Oxford FH           |     |                                                     |     |                                                   |                             |
| 4 | UK10K_HYP5231651 | Oxford FH           |     |                                                     |     |                                                   |                             |
| 4 | UK10K_HYP5231652 | Oxford FH           |     |                                                     |     |                                                   |                             |
| 4 | UK10K_HYP5231653 | Oxford FH           |     |                                                     |     |                                                   |                             |
| 4 | UK10K_HYP5231654 | Oxford FH           |     |                                                     |     |                                                   |                             |
| 4 | UK10K_HYP5231655 | Oxford FH           |     |                                                     |     |                                                   |                             |
| 4 | UK10K_HYP5231656 | Oxford FH           |     |                                                     |     |                                                   |                             |
| 4 | UK10K_HYP5231657 | Oxford FH           |     |                                                     |     |                                                   |                             |
| 4 | UK10K_HYP5231658 | Oxford FH           |     |                                                     |     |                                                   |                             |
| 3 | UK10K_HYP5159266 | RFH                 | (7) | all exons and promoter by SSCP or Sanger sequencing | yes | ARMS for p.R3527Q                                 | ARMS for p.D374Y            |
| 3 | UK10K_HYP5159267 | RFH                 |     |                                                     |     |                                                   |                             |
| 3 | UK10K_HYP5159268 | RFH                 |     |                                                     |     |                                                   |                             |
| 3 | UK10K_HYP5159269 | RFH                 |     |                                                     |     |                                                   |                             |
| 3 | UK10K_HYP5159270 | RFH                 |     |                                                     |     |                                                   |                             |
| 1 | UK10K_HYP5002209 | SBBHF               | (8- | all exons and                                       | yes | RFLP for                                          | all exons by HRM            |

|   |                  |       |     |                 |  |          |  |
|---|------------------|-------|-----|-----------------|--|----------|--|
| 1 | UK10K_HYP5002210 | SBBHF | 11) | promoter by HRM |  | p.R3527Q |  |
| 1 | UK10K_HYP5002211 | SBBHF |     |                 |  |          |  |
| 1 | UK10K_HYP5002212 | SBBHF |     |                 |  |          |  |
| 1 | UK10K_HYP5002213 | SBBHF |     |                 |  |          |  |
| 1 | UK10K_HYP5002214 | SBBHF |     |                 |  |          |  |
| 1 | UK10K_HYP5002215 | SBBHF |     |                 |  |          |  |
| 1 | UK10K_HYP5002216 | SBBHF |     |                 |  |          |  |
| 1 | UK10K_HYP5002217 | SBBHF |     |                 |  |          |  |
| 1 | UK10K_HYP5002218 | SBBHF |     |                 |  |          |  |
| 1 | UK10K_HYP5002219 | SBBHF |     |                 |  |          |  |
| 1 | UK10K_HYP5002220 | SBBHF |     |                 |  |          |  |
| 1 | UK10K_HYP5002221 | SBBHF |     |                 |  |          |  |
| 1 | UK10K_HYP5002222 | SBBHF |     |                 |  |          |  |
| 1 | UK10K_HYP5002223 | SBBHF |     |                 |  |          |  |
| 1 | UK10K_HYP5002224 | SBBHF |     |                 |  |          |  |
| 1 | UK10K_HYP5002225 | SBBHF |     |                 |  |          |  |
| 1 | UK10K_HYP5002226 | SBBHF |     |                 |  |          |  |
| 1 | UK10K_HYP5002227 | SBBHF |     |                 |  |          |  |
| 1 | UK10K_HYP5002228 | SBBHF |     |                 |  |          |  |
| 1 | UK10K_HYP5002229 | SBBHF |     |                 |  |          |  |
| 1 | UK10K_HYP5002230 | SBBHF |     |                 |  |          |  |
| 1 | UK10K_HYP5002231 | SBBHF |     |                 |  |          |  |
| 1 | UK10K_HYP5002232 | SBBHF |     |                 |  |          |  |
| 2 | UK10K_HYP5062209 | SBBHF |     |                 |  |          |  |
| 2 | UK10K_HYP5062210 | SBBHF |     |                 |  |          |  |
| 2 | UK10K_HYP5062211 | SBBHF |     |                 |  |          |  |
| 2 | UK10K_HYP5062212 | SBBHF |     |                 |  |          |  |
| 2 | UK10K_HYP5062213 | SBBHF |     |                 |  |          |  |
| 2 | UK10K_HYP5062214 | SBBHF |     |                 |  |          |  |
| 2 | UK10K_HYP5062215 | SBBHF |     |                 |  |          |  |
| 2 | UK10K_HYP5062216 | SBBHF |     |                 |  |          |  |
| 2 | UK10K_HYP5062217 | SBBHF |     |                 |  |          |  |
| 2 | UK10K_HYP5062218 | SBBHF |     |                 |  |          |  |

|   |                  |       |  |  |  |  |
|---|------------------|-------|--|--|--|--|
| 2 | UK10K_HYP5062219 | SBBHF |  |  |  |  |
| 2 | UK10K_HYP5062220 | SBBHF |  |  |  |  |
| 2 | UK10K_HYP5062221 | SBBHF |  |  |  |  |
| 2 | UK10K_HYP5062222 | SBBHF |  |  |  |  |
| 2 | UK10K_HYP5062223 | SBBHF |  |  |  |  |
| 2 | UK10K_HYP5062224 | SBBHF |  |  |  |  |
| 2 | UK10K_HYP5062225 | SBBHF |  |  |  |  |
| 2 | UK10K_HYP5062226 | SBBHF |  |  |  |  |
| 2 | UK10K_HYP5062227 | SBBHF |  |  |  |  |
| 2 | UK10K_HYP5062228 | SBBHF |  |  |  |  |
| 2 | UK10K_HYP5062229 | SBBHF |  |  |  |  |
| 2 | UK10K_HYP5062230 | SBBHF |  |  |  |  |
| 2 | UK10K_HYP5062231 | SBBHF |  |  |  |  |
| 2 | UK10K_HYP5062232 | SBBHF |  |  |  |  |
| 5 | UK10K_HYP5269585 | SBBHF |  |  |  |  |
| 5 | UK10K_HYP5269589 | SBBHF |  |  |  |  |
| 5 | UK10K_HYP5269595 | SBBHF |  |  |  |  |
| 5 | UK10K_HYP5269597 | SBBHF |  |  |  |  |
| 5 | UK10K_HYP5269598 | SBBHF |  |  |  |  |
| 5 | UK10K_HYP5269601 | SBBHF |  |  |  |  |
| 5 | UK10K_HYP5269602 | SBBHF |  |  |  |  |
| 6 | UK10K_HYP5315266 | SBBHF |  |  |  |  |
| 6 | UK10K_HYP5315268 | SBBHF |  |  |  |  |
| 6 | UK10K_HYP5315271 | SBBHF |  |  |  |  |
| 6 | UK10K_HYP5315273 | SBBHF |  |  |  |  |
| 6 | UK10K_HYP5315275 | SBBHF |  |  |  |  |
| 7 | UK10K_HYP5358898 | SBBHF |  |  |  |  |
| 7 | UK10K_HYP5358899 | SBBHF |  |  |  |  |
| 7 | UK10K_HYP5358900 | SBBHF |  |  |  |  |
| 7 | UK10K_HYP5358901 | SBBHF |  |  |  |  |
| 7 | UK10K_HYP5358902 | SBBHF |  |  |  |  |

Table S2.

Tier 2 candidate genes – LDL-C (lead trait) associated loci from Teslovich et al. GWAS meta-analysis (either a plausible biological candidate gene in the locus or the nearest annotated gene to the lead SNP) (12). Where associated SNP was located in a gene cluster, other genes in the region were included.

| Gene ID                      |
|------------------------------|
| <i>ABCG5</i>                 |
| <i>ABCG8</i>                 |
| <i>ABO</i>                   |
| <i>APOE</i>                  |
| <i>APOC1 (APOE locus)</i>    |
| <i>TOMM40 (APOE locus)</i>   |
| <i>PVRL2 (APOE locus)</i>    |
| <i>HFE</i>                   |
| <i>LPA</i>                   |
| <i>MYLIP</i>                 |
| <i>NYNRIN</i>                |
| <i>OSBPL7</i>                |
| <i>SORT1</i>                 |
| <i>CELSR2 (SORT1 locus)</i>  |
| <i>PSRC1 (SORT1 locus)</i>   |
| <i>ST3GAL4</i>               |
| <i>DCPS (ST3GAL4 locus)</i>  |
| <i>KIRREL3</i>               |
| <i>TOP1</i>                  |
| <i>PLCG1 (TOP1 locus)</i>    |
| <i>ZHX3 (TOP1 locus)</i>     |
| <i>LPIN3 (TOP1 locus)</i>    |
| <i>PLEC1</i>                 |
| <i>PARP10 (PLEC locus)</i>   |
| <i>GRINA (PLEC locus)</i>    |
| <i>SPATC1 (PLEC locus)</i>   |
| <i>OPLAH (PLEC locus)</i>    |
| <i>EXOSC4 (PLEC locus)</i>   |
| <i>GPAA1 (PLEC locus)</i>    |
| <i>KIAA1875 (PLEC locus)</i> |
| <i>CYC1 (PLEC locus)</i>     |
| <i>SHARPIN (PLEC locus)</i>  |
| <i>MAF1 (PLEC locus)</i>     |

Table S3.

The top LDL-rising SNPs and their effects (as reported by the GLGC) used for the LDL-C gene score genotyping and calculation.

| SNP ID                 | Nearest gene   | Risk Allele | Beta coefficient (mmol/l) |
|------------------------|----------------|-------------|---------------------------|
| rs2479409              | <i>PCSK9</i>   | G           | 0.051978278               |
| rs629301               | <i>CELSR2</i>  | T           | 0.146108094               |
| rs1367117              | <i>APOB</i>    | A           | 0.104732351               |
| rs4299376 (rs6544713)  | <i>ABCG8</i>   | T           | 0.071114559               |
| rs3757354              | <i>MYLIP</i>   | C           | 0.036979571               |
| rs1800562              | <i>HFE</i>     | G           | 0.057408844               |
| rs1564348              | <i>SLC22A1</i> | T           | 0.01448151                |
| rs4055111 (rs11220462) | <i>ST3GAL4</i> | G           | 0.050426687               |
| rs8017377              | <i>NYNRIN</i>  | A           | 0.029480217               |
| rs6511720              | <i>LDLR</i>    | G           | 0.180760279               |

Table S4.  
Summary of the identified *LDLR* mutations and their *in silico* predicted effect, including calculated LDL-C gene scores for the mutations carriers (presented in bold are the gene scores that are above the top decile cutoff for the control population).

| Mutation type/Exon          | Mutation                         | Gene Score    | PolyPhen                                        | SIFT          | Mutation Taster |
|-----------------------------|----------------------------------|---------------|-------------------------------------------------|---------------|-----------------|
| <b>Missense</b>             |                                  |               |                                                 |               |                 |
| 4                           | c.326G>A (p.C109Y)               | 1.03          | Probably damaging                               | Not tolerated | Disease Causing |
| 4                           | 2X c.502G>C (p.D168H)            | 0.91, N/A     | Probably damaging                               | Not tolerated | Disease Causing |
| 4                           | c.681C>G (p.D227E)               | N/A           | Probably damaging                               | Not tolerated | Disease Causing |
| 9                           | 2X c.1196C>A (p.A399D)           | 1.03 and 1.07 | Possibly damaging                               | Not tolerated | Disease Causing |
| 11                          | c.1690A>C (p.N564H) <sup>1</sup> | 1.17          | Probably damaging                               | Tolerated     | Disease Causing |
| 12                          | c.1823C>T (p.P608L)              | 1.09          | Probably damaging                               | Not tolerated | Disease Causing |
| 14                          | c.2054C>T (p.P685L)              | 0.97          | Probably damaging                               | Not tolerated | Disease Causing |
| 17                          | c.2479G>A (p.V827I)              | 0.92          | Probably damaging                               | Not tolerated | Disease Causing |
| <b>Nonsense</b>             |                                  |               |                                                 |               |                 |
| 4                           | 2X c.682G>T (p.E228*)            | 0.78 and 0.84 | NA                                              | NA            | Disease Causing |
| 7                           | c.1048C>T (p.R350*)              | 1.11          | NA                                              | NA            | Disease Causing |
| 8                           | c.1150C>T (p.Q384*)              | 0.65          | NA                                              | NA            | Disease Causing |
| 11                          | c.1685G>A (p.W562*)              | 0.95          | NA                                              | NA            | Disease Causing |
| <b>Indels</b>               |                                  |               |                                                 |               |                 |
| 5                           | c.695-6_698del                   | 1.23          | NA                                              | NA            | Disease Causing |
| 12                          | 2X c.1776_1778del p.G592del      | N/A           | NA                                              | NA            | Disease Causing |
| <b>Intronic</b>             |                                  |               |                                                 |               |                 |
| intron14                    | c.2140+1G>A                      | 0.58          | NA                                              | NA            | Disease Causing |
| intron9                     | c.1359-31_1359-23 delinsCGGCT    | 0.92          | NA                                              | NA            | NA              |
| <b>Large rearrangements</b> |                                  |               |                                                 |               |                 |
| 3_8                         | c.191-?_1186+?dup                | 1.03          | 10kb in frame duplication, peptide elongation   |               |                 |
| 11_12                       | c.1587-?_1845+?del               | N/A           | 4kb out of frame deletion, truncated protein    |               |                 |
| 13_15                       | c.1846-?_2311+?dup               | 0.92          | 7kb out of frame duplication, truncated peptide |               |                 |

**N/A - not available**

**NA - not applicable**

**1 – carrier of this variant also has a deletion in exon 17 of *LDLR* c.2393\_2401del9 (p.L799\_V801del))**

Table S5.

All *novel functional APOB* variants identified in the FH cases, including *in silico* predictions of their effect and LDL-C gene scores for the corresponding variant carriers. Using *in silico* mutation prediction tools (PolyPhen2, SIFT, Mutation Taster) the variant located in exon 3 of *APOB* (c.148C>T (p.R50W)) has been predicted to be pathogenic by all three algorithms. The mutant Tryptophan is bigger than the wild type Arginine and it is predicted to cause a loss of hydrogen bonds in the core of the protein, which may result in an incorrect folding. The variant has been recently shown to co-segregate with the disease (Thomas et al., *Molecular Genetics & Genomic Medicine* 2013; 1(3) 155–161). Other variants include c.598G>A (p.A200T), c.1199G>A (p.R400H), and c.G2700G>T (p.Q900H) in both cases the mutant differs in size and hydrophobicity from the wild type residue, which may affect the folding of the protein as well as the hydrophobic interactions within the protein's core. The novel c.10277C>T (p.A3426V) variant is located near to the LDL-receptor-binding site (13), and although it has been predicted as benign/tolerated/polymorphism by the *in silico* tools, it may affect the LDL-R/ApoB interaction. The known FH-causing mutation (p.R3527Q), which was found in two patients, is also listed.

| Exon | Variant                                                          | Gene Score       | PolyPhen          | SIFT            | MutationTaster                  | ID                           |
|------|------------------------------------------------------------------|------------------|-------------------|-----------------|---------------------------------|------------------------------|
| 3    | c.148C>T(p.R50W)                                                 | 0.83             | Probably Damaging | Not Tolerated   | Disease Causing                 | HYP5062228                   |
| 6    | c.598G>A (p.A200T)                                               | 0.98             | Possibly Damaging | Not Tolerated   | Polymorphism                    | HYP5269576                   |
| 10   | c.1199G>A(p.R400H)                                               | N/A              | Benign            | Not Tolerated   | Polymorphism                    | HYP5159267                   |
| 18   | c.G2700G>T (p.Q900H)                                             | 1.19             | Probably Damaging | Not Tolerated   | Polymorphism                    | HYP5358899                   |
| 26   | c.10277C>T (p.A3426V) and<br>c.6639_6641delTGA (p.2213_2214delD) | 1.17             | Benign<br>NA      | Tolerated<br>NA | Polymorphism<br>Disease Causing | HYP5002222                   |
|      | 2 X c.G10580G>A (p.R3527Q)                                       | 0.71<br>and 1.01 | Probably Damaging | Not Tolerated   | Disease Causing                 | HYP5062226<br>and HYP5062216 |

NA- not applicable.



Table S6.

Top *p* values of the *novel functional* variant association between cases and controls in the Tier 2 candidate genes.

| Gene            | Variants in cases<br>(n=71) | Variants in<br>controls<br>(n=1,926) | <i>p</i> value |
|-----------------|-----------------------------|--------------------------------------|----------------|
| <i>KIAA1875</i> | 3                           | 13                                   | 0.02           |
| <i>NYNRIN</i>   | 3                           | 18                                   | 0.04           |
| <i>CYC1</i>     | 1                           | 4                                    | 0.17           |
| <i>HFE</i>      | 1                           | 4                                    | 0.17           |
| <i>TOP1</i>     | 1                           | 4                                    | 0.17           |
| <i>ZHX3</i>     | 2                           | 20                                   | 0.18           |
| <i>PVRL2</i>    | 1                           | 7                                    | 0.25           |
| <i>ABCG8</i>    | 1                           | 18                                   | 0.50           |
| <i>OSBPL7</i>   | 1                           | 19                                   | 0.52           |
| <i>CELSR2</i>   | 1                           | 35                                   | 0.73           |
| <i>ABCG5</i>    | 0                           | 6                                    | 1              |
| <i>APOC1</i>    | 0                           | 2                                    | 1              |
| <i>APOE</i>     | 0                           | 2                                    | 1              |
| <i>DCPS</i>     | 0                           | 8                                    | 1              |
| <i>EXOSC4</i>   | 0                           | 8                                    | 1              |
| <i>GPAA1</i>    | 0                           | 21                                   | 1              |
| <i>GRINA</i>    | 0                           | 9                                    | 1              |
| <i>KIRREL3</i>  | 0                           | 9                                    | 1              |
| <i>LPA</i>      | 0                           | 34                                   | 1              |
| <i>LPIN3</i>    | 0                           | 17                                   | 1              |
| <i>MAF1</i>     | 0                           | 5                                    | 1              |
| <i>MYLIP</i>    | 0                           | 8                                    | 1              |
| <i>PARP10</i>   | 0                           | 11                                   | 1              |
| <i>PLCG1</i>    | 0                           | 25                                   | 1              |
| <i>PSRC1</i>    | 0                           | 4                                    | 1              |
| <i>SHARPIN</i>  | 0                           | 4                                    | 1              |
| <i>SORT1</i>    | 0                           | 9                                    | 1              |
| <i>SPATC1</i>   | 0                           | 12                                   | 1              |
| <i>ST3GAL4</i>  | 0                           | 13                                   | 1              |
| <i>TOMM40</i>   | 0                           | 3                                    | 1              |

Table S7.

Gene burden test of *novel functional* variants for genes in loci associated with FH in family linkage studies.

| Chromosomal region | Gene name         | Number of rare functional variants |                   | p value |
|--------------------|-------------------|------------------------------------|-------------------|---------|
|                    |                   | cases (n=71)                       | controls (n=1926) |         |
| 21q22 (14)         | <i>KRTAP10-11</i> | 2                                  | 2                 | 0.02    |
|                    | <i>PFKL</i>       | 2                                  | 4                 | 0.03    |
|                    | <i>DSCR8</i>      | 1                                  | 0                 | 0.05    |
|                    | <i>KRTAP11-1</i>  | 1                                  | 0                 | 0.05    |
|                    | <i>ERG</i>        | 2                                  | 8                 | 0.09    |
|                    | <i>KRTAP19-8</i>  | 1                                  | 1                 | 0.10    |
|                    | <i>LRRC3</i>      | 2                                  | 10                | 0.13    |
|                    | <i>RCAN1</i>      | 1                                  | 2                 | 0.15    |
|                    | <i>SIM2</i>       | 1                                  | 2                 | 0.15    |
|                    | <i>SYNJ1</i>      | 3                                  | 24                | 0.16    |
|                    | <i>CBR1</i>       | 2                                  | 15                | 0.22    |
|                    | <i>COL18A1</i>    | 3                                  | 30                | 0.24    |
|                    | <i>ZNF295</i>     | 2                                  | 17                | 0.26    |
|                    | <i>C21orf59</i>   | 1                                  | 5                 | 0.27    |
|                    | <i>C21orf90</i>   | 1                                  | 5                 | 0.27    |
|                    | <i>ETS2</i>       | 1                                  | 5                 | 0.27    |
|                    | <i>C21orf56</i>   | 1                                  | 6                 | 0.31    |
|                    | <i>KRTAP12-4</i>  | 1                                  | 6                 | 0.31    |
|                    | <i>PKNOX1</i>     | 1                                  | 6                 | 0.31    |
|                    | <i>PCNT</i>       | 5                                  | 68                | 0.33    |
|                    | <i>BACH1</i>      | 1                                  | 7                 | 0.35    |
|                    | <i>MX1</i>        | 1                                  | 7                 | 0.35    |
|                    | <i>BRWD1</i>      | 2                                  | 24                | 0.39    |
|                    | <i>PRDM15</i>     | 2                                  | 25                | 0.41    |
|                    | <i>HLCS</i>       | 1                                  | 9                 | 0.41    |
|                    | <i>PRMT2</i>      | 1                                  | 9                 | 0.41    |
|                    | <i>DOPEY2</i>     | 3                                  | 43                | 0.43    |
|                    | <i>SUMO3</i>      | 1                                  | 10                | 0.44    |
|                    | <i>MX2</i>        | 1                                  | 11                | 0.47    |
|                    | <i>TTC3</i>       | 2                                  | 29                | 0.48    |
|                    | <i>AIRE</i>       | 1                                  | 13                | 0.53    |
|                    | <i>TRPM2</i>      | 2                                  | 35                | 0.58    |
|                    | <i>ABCG1</i>      | 1                                  | 16                | 0.60    |
|                    | <i>FTCD</i>       | 1                                  | 17                | 0.62    |
|                    | <i>ITSN1</i>      | 1                                  | 20                | 0.67    |
|                    | <i>LSS</i>        | 1                                  | 20                | 0.67    |
|                    | <i>DSCAM</i>      | 1                                  | 21                | 0.69    |
|                    | <i>COL6A2</i>     | 1                                  | 23                | 0.72    |
|                    | <i>C21orf2</i>    | 1                                  | 24                | 0.74    |
|                    | <i>TRAPPC10</i>   | 1                                  | 24                | 0.74    |
|                    | <i>TSPEAR</i>     | 1                                  | 24                | 0.74    |
|                    | <i>UMODL1</i>     | 1                                  | 30                | 0.81    |
|                    | <i>ITGB2</i>      | 1                                  | 33                | 0.84    |
|                    | <i>MCM3AP</i>     | 1                                  | 36                | 0.86    |
| <i>URB1</i>        | 1                 | 57                                 | 0.95              |         |

|               |                 |    |      |      |
|---------------|-----------------|----|------|------|
| 16q22 (15)    | <i>CMTM2</i>    | 2  | 3    | 0.02 |
|               | <i>HSF4</i>     | 2  | 6    | 0.06 |
|               | <i>KCTD19</i>   | 2  | 7    | 0.08 |
|               | <i>CES4A</i>    | 2  | 8    | 0.09 |
|               | <i>CMTM4</i>    | 1  | 2    | 0.15 |
|               | <i>TMEM208</i>  | 1  | 3    | 0.19 |
|               | <i>CMTM3</i>    | 1  | 5    | 0.27 |
|               | <i>DPEP3</i>    | 1  | 5    | 0.27 |
|               | <i>TMCO7</i>    | 1  | 5    | 0.27 |
|               | <i>PLEKHG4</i>  | 2  | 19   | 0.30 |
|               | <i>C16orf48</i> | 1  | 6    | 0.31 |
|               | <i>CDH16</i>    | 2  | 20   | 0.32 |
|               | <i>CES3</i>     | 1  | 11   | 0.47 |
|               | <i>CDH3</i>     | 1  | 13   | 0.53 |
|               | <i>COG4</i>     | 1  | 14   | 0.55 |
|               | <i>GFOD2</i>    | 1  | 16   | 0.60 |
|               | <i>TSNAXIP1</i> | 1  | 17   | 0.62 |
|               | <i>FHOD1</i>    | 1  | 19   | 0.65 |
|               | <i>SLC12A4</i>  | 1  | 19   | 0.65 |
|               | <i>FUK</i>      | 1  | 23   | 0.72 |
| 8q24 (16)     | <i>WISP1</i>    | 3  | 25   | 0.17 |
|               | <i>ST3GAL1</i>  | 1  | 8    | 0.38 |
|               | <i>ZFAT</i>     | 2  | 28   | 0.46 |
| 3q25 (14)     | <i>HPS3</i>     | 3  | 15   | 0.06 |
|               | <i>ZBBX</i>     | 2  | 8    | 0.09 |
|               | <i>NMD3</i>     | 1  | 1    | 0.10 |
|               | <i>TRIM59</i>   | 1  | 1    | 0.10 |
|               | <i>MLF1</i>     | 2  | 11   | 0.14 |
|               | <i>ANKUB1</i>   | 1  | 2    | 0.15 |
|               | <i>IL12A</i>    | 1  | 2    | 0.15 |
|               | <i>OTOL1</i>    | 2  | 13   | 0.18 |
|               | <i>C3orf80</i>  | 1  | 3    | 0.19 |
|               | <i>WWTR1</i>    | 1  | 4    | 0.23 |
|               | <i>SLITRK3</i>  | 2  | 17   | 0.26 |
|               | <i>SMC4</i>     | 1  | 6    | 0.31 |
|               | <i>B3GALNT1</i> | 1  | 9    | 0.41 |
|               | <i>MFSD1</i>    | 1  | 9    | 0.41 |
|               | <i>SI</i>       | 2  | 35   | 0.58 |
|               | <i>MED12L</i>   | 2  | 36   | 0.59 |
|               | <i>MECOM</i>    | 1  | 24   | 0.74 |
| <i>IGSF10</i> | 1               | 34 | 0.84 |      |

Table S8.

All top genes showing a significant excess of *novel functional* variants in cases vs. controls before adjusting for false positive calls. The list includes genes located on chromosome X.

| Gene            | Number of variants in cases (n=71) | Number of variants in controls (n=1,926) | p value               |
|-----------------|------------------------------------|------------------------------------------|-----------------------|
| <i>TMPRSS13</i> | 6                                  | 7                                        | 2.79x10 <sup>-6</sup> |
| <i>CH25H</i>    | 3                                  | 2                                        | 4.3x10 <sup>-4</sup>  |
| <i>ARMCX2</i>   | 3                                  | 3                                        | 8.29x10 <sup>-4</sup> |
| <i>HSPB7</i>    | 2                                  | 0                                        | 1.26x10 <sup>-3</sup> |
| <i>KLRC1</i>    | 2                                  | 0                                        | 1.26x10 <sup>-3</sup> |
| <i>ZNF645</i>   | 2                                  | 0                                        | 1.26x10 <sup>-3</sup> |
| <i>MOAP1</i>    | 3                                  | 4                                        | 1.41x10 <sup>-3</sup> |
| <i>RBM25</i>    | 3                                  | 4                                        | 1.41x10 <sup>-3</sup> |
| <i>TTC39A</i>   | 4                                  | 13                                       | 2.62x10 <sup>-3</sup> |
| <i>ZNF785</i>   | 4                                  | 13                                       | 2.62x10 <sup>-3</sup> |
| <i>FZD9</i>     | 3                                  | 6                                        | 3.21x10 <sup>-3</sup> |
| <i>HEMK1</i>    | 3                                  | 6                                        | 3.21x10 <sup>-3</sup> |
| <i>PCGF3</i>    | 4                                  | 14                                       | 3.28x10 <sup>-3</sup> |
| <i>KIF1B</i>    | 5                                  | 24                                       | 3.3x10 <sup>-3</sup>  |
| <i>ANP32E</i>   | 2                                  | 1                                        | 3.7x10 <sup>-3</sup>  |
| <i>CABP5</i>    | 2                                  | 1                                        | 3.7x10 <sup>-3</sup>  |
| <i>CELA2B</i>   | 2                                  | 1                                        | 3.7x10 <sup>-3</sup>  |
| <i>INSIG2</i>   | 2                                  | 1                                        | 3.7x10 <sup>-3</sup>  |
| <i>KCTD7</i>    | 2                                  | 1                                        | 3.7x10 <sup>-3</sup>  |
| <i>MRO</i>      | 2                                  | 1                                        | 3.7x10 <sup>-3</sup>  |
| <i>NR2E1</i>    | 2                                  | 1                                        | 3.7x10 <sup>-3</sup>  |
| <i>NXT2</i>     | 2                                  | 1                                        | 3.7x10 <sup>-3</sup>  |
| <i>PABPC1</i>   | 2                                  | 1                                        | 3.7x10 <sup>-3</sup>  |
| <i>PODXL</i>    | 2                                  | 1                                        | 3.7x10 <sup>-3</sup>  |
| <i>PUS3</i>     | 2                                  | 1                                        | 3.7x10 <sup>-3</sup>  |
| <i>TXNDC15</i>  | 2                                  | 1                                        | 3.7x10 <sup>-3</sup>  |
| <i>WDR89</i>    | 2                                  | 1                                        | 3.7x10 <sup>-3</sup>  |
| <i>ZNF720</i>   | 2                                  | 1                                        | 3.7x10 <sup>-3</sup>  |

## REFERENCE

1. S. A. Miller, D. D. Dykes, H. F. Polesky, A simple salting out procedure for extracting DNA from human nucleated cells. *Nucleic Acids Res* **16**, 1215 (Feb 11, 1988).
2. S. W. Fouchier, J. C. Defesche, M. W. Umans-Eckenhuis, J. P. Kastelein, The molecular basis of familial hypercholesterolemia in The Netherlands. *Human genetics* **109**, 602 (Dec, 2001).
3. A. J. Hooper *et al.*, Genetic analysis of familial hypercholesterolaemia in Western Australia. *Atherosclerosis* **224**, 430 (Oct, 2012).
4. S. Bertolini *et al.*, Spectrum of mutations and phenotypic expression in patients with autosomal dominant hypercholesterolemia identified in Italy. *Atherosclerosis* **227**, 342 (Apr, 2013).
5. C. A. Graham *et al.*, Mutation screening and genotype:phenotype correlation in familial hypercholesterolaemia. *Atherosclerosis* **147**, 309 (Dec, 1999).
6. M. Futema *et al.*, Analysis of the frequency and spectrum of mutations recognised to cause familial hypercholesterolaemia in routine clinical practice in a UK specialist hospital lipid clinic. *Atherosclerosis*, (Apr, 2013).
7. A. Taylor *et al.*, Mutation detection rate and spectrum in familial hypercholesterolaemia patients in the UK pilot cascade project. *Clinical genetics* **77**, 572 (Jun, 2010).
8. R. A. Whittall *et al.*, Development of a high-resolution melting method for mutation detection in familial hypercholesterolaemia patients. *Ann Clin Biochem* **47**, 44 (Jan, 2010).
9. C. D. Mamotte, F. M. van Bockxmeer, A robust strategy for screening and confirmation of familial defective apolipoprotein B-100. *Clinical chemistry* **39**, 118 (Jan, 1993).
10. S. E. Humphries *et al.*, Genetic causes of familial hypercholesterolaemia in patients in the UK: relation to plasma lipid levels and coronary heart disease risk. *J Med Genet* **43**, 943 (Dec, 2006).
11. A. Taylor *et al.*, Multiplex ligation-dependent probe amplification analysis to screen for deletions and duplications of the LDLR gene in patients with familial hypercholesterolaemia. *Clin Genet* **76**, 69 (Jul, 2009).
12. T. M. Teslovich *et al.*, Biological, clinical and population relevance of 95 loci for blood lipids. *Nature* **466**, 707 (Aug 5, 2010).
13. J. Boren *et al.*, Identification of the low density lipoprotein receptor-binding site in apolipoprotein B100 and the modulation of its binding activity by the carboxyl terminus in familial defective apo-B100. *The Journal of clinical investigation* **101**, 1084 (Mar 1, 1998).
14. X. Wang *et al.*, Genome-wide linkage scan of a pedigree with familial hypercholesterolemia suggests susceptibility loci on chromosomes 3q25-26 and 21q22. *PLoS one* **6**, e24838 (2011).
15. A. Marques-Pinheiro *et al.*, A fourth locus for autosomal dominant hypercholesterolemia maps at 16q22.1. *European journal of human genetics : EJHG* **18**, 1236 (Nov, 2010).
16. A. Cenarro *et al.*, A presumptive new locus for autosomal dominant hypercholesterolemia mapping to 8q24.22. *Clin Genet* **79**, 475 (May, 2011).
